# Supplementary material for: The Effects of Four Weeks of Chiropractic Spinal Adjustments on Blood Biomarkers in Adults with Chronic Stroke: Secondary Outcomes of a Randomized Controlled Trial
Source: MDPI journal article supplement (doi:10.3390/jcm11247493), 2022-12-17

# Stats Reort:The effects of four weeks of chiropractic spinal adjustments on blood biomarkers in adults with chronic stroke: A randomized controlled trial

Usman Rashid

## Contents

|          |                                                       |          |
|----------|-------------------------------------------------------|----------|
| <b>1</b> | <b>Data Visualisations</b>                            | <b>3</b> |
| 1.1      | Data Normality Check and Log Transformation . . . . . | 3        |
| 1.2      | Box and Scatter Plots . . . . .                       | 5        |
| <b>2</b> | <b>Statistical Model</b>                              | <b>7</b> |
| 2.1      | Multivariate Analysis of Variance . . . . .           | 7        |
| 2.2      | Diagnostics for the Model . . . . .                   | 7        |
| <b>3</b> | <b>Results</b>                                        | <b>8</b> |
| 3.1      | MANOVA Table . . . . .                                | 8        |
| 3.2      | Estimated Means and their Contrasts . . . . .         | 8        |
| 3.3      | Estimated Means Plot . . . . .                        | 9        |

# 1 Data Visualisations

## 1.1 Data Normality Check and Log Transformation

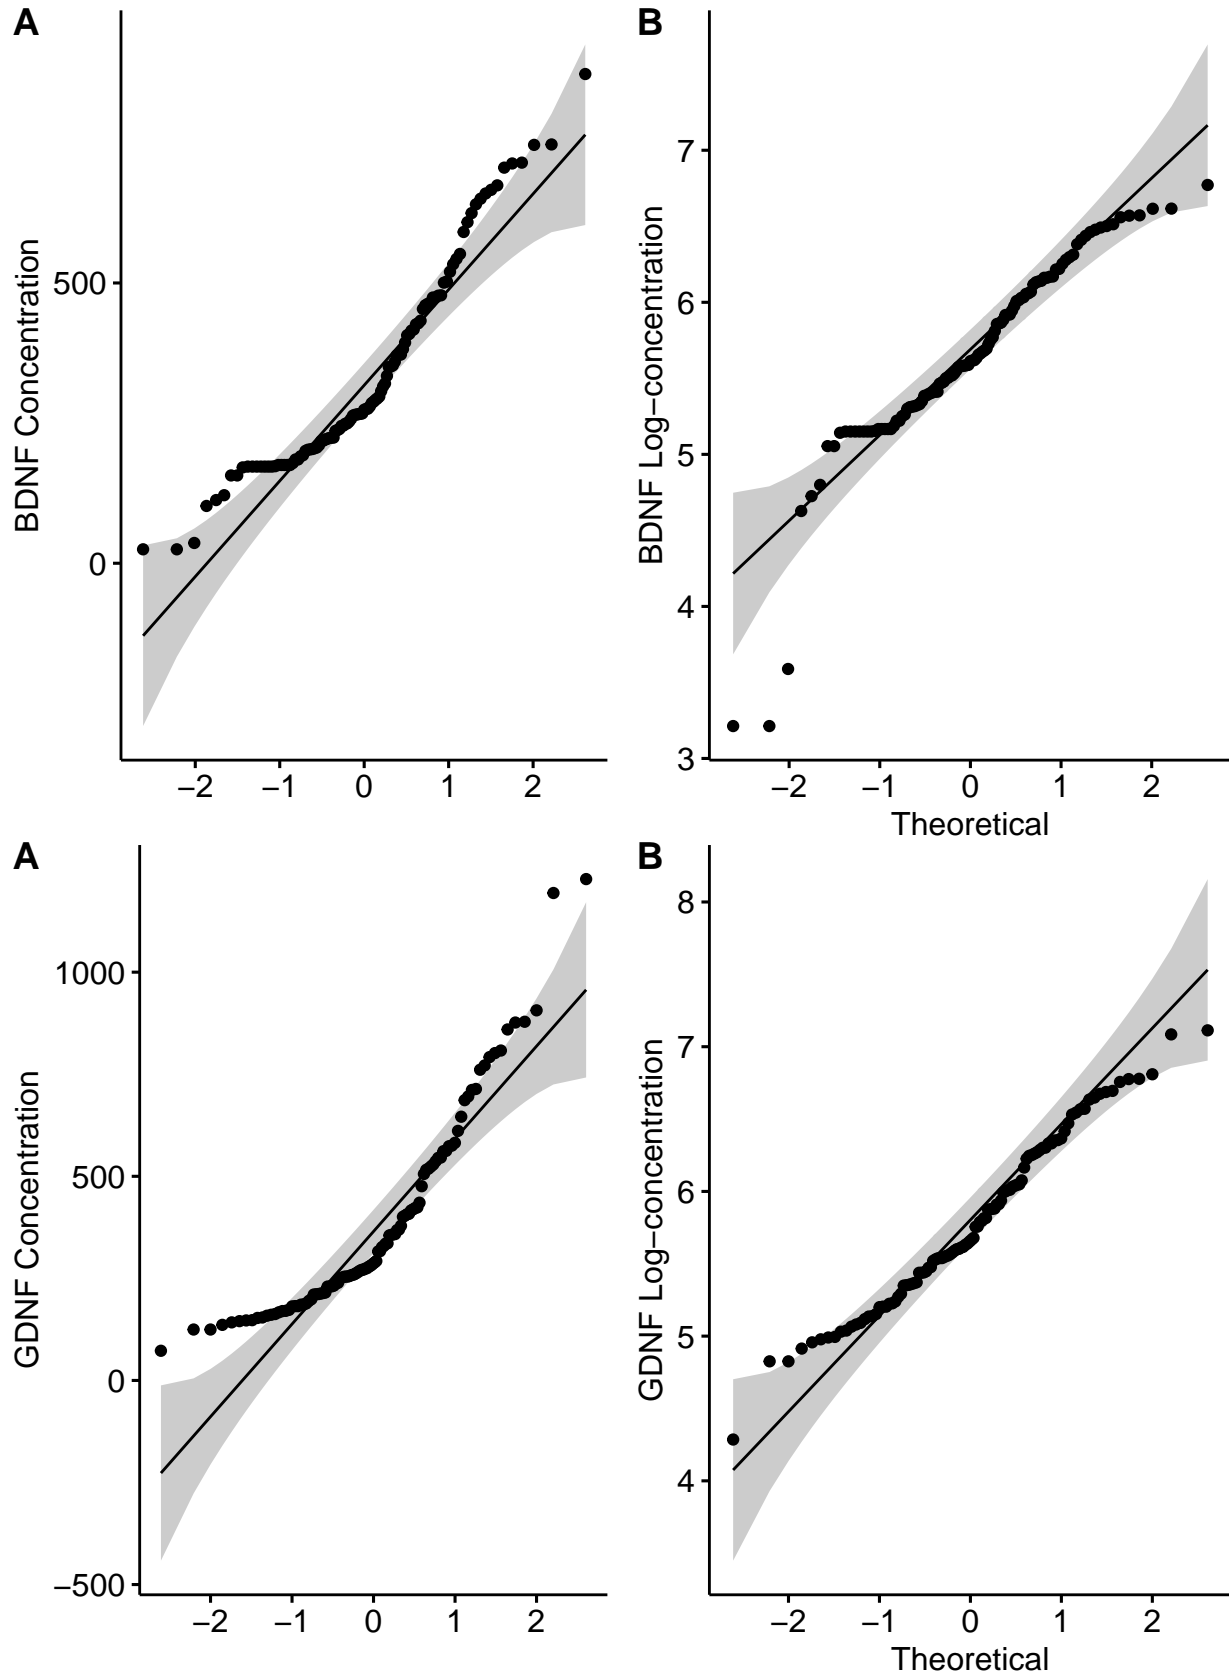

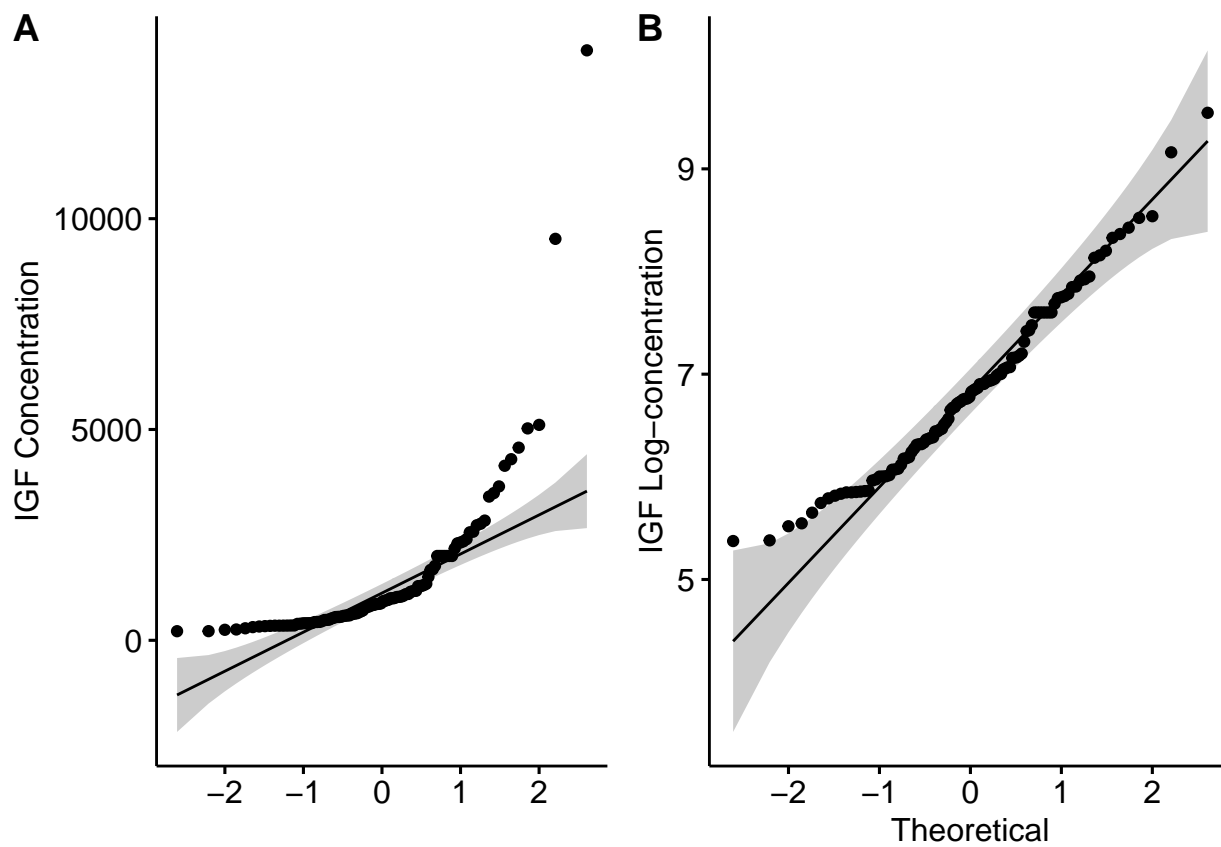

## 1.2 Box and Scatter Plots

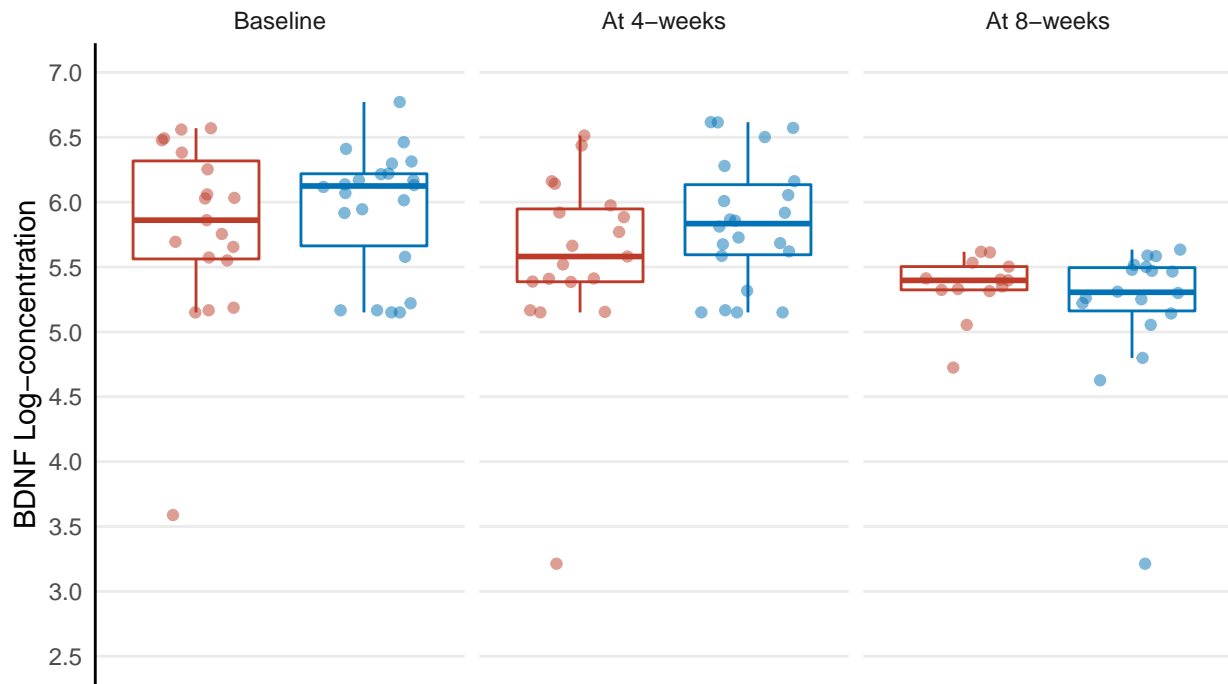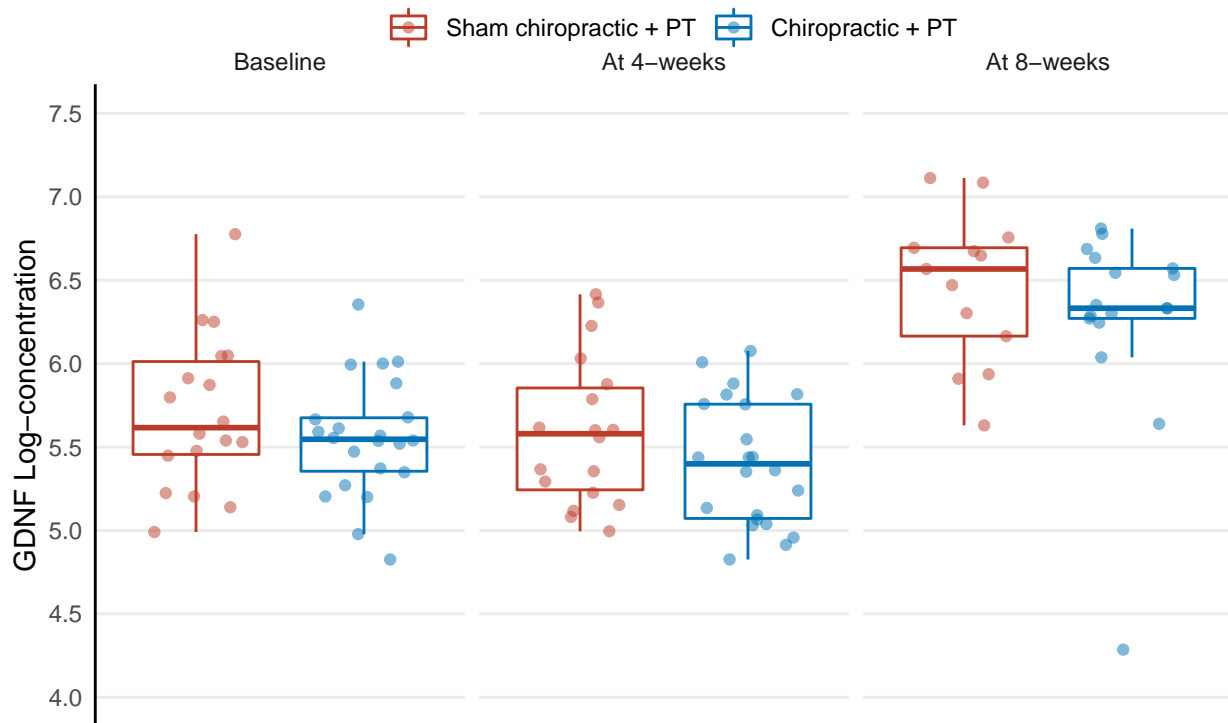

Sham chiropractic + PT Chiropractic + PT

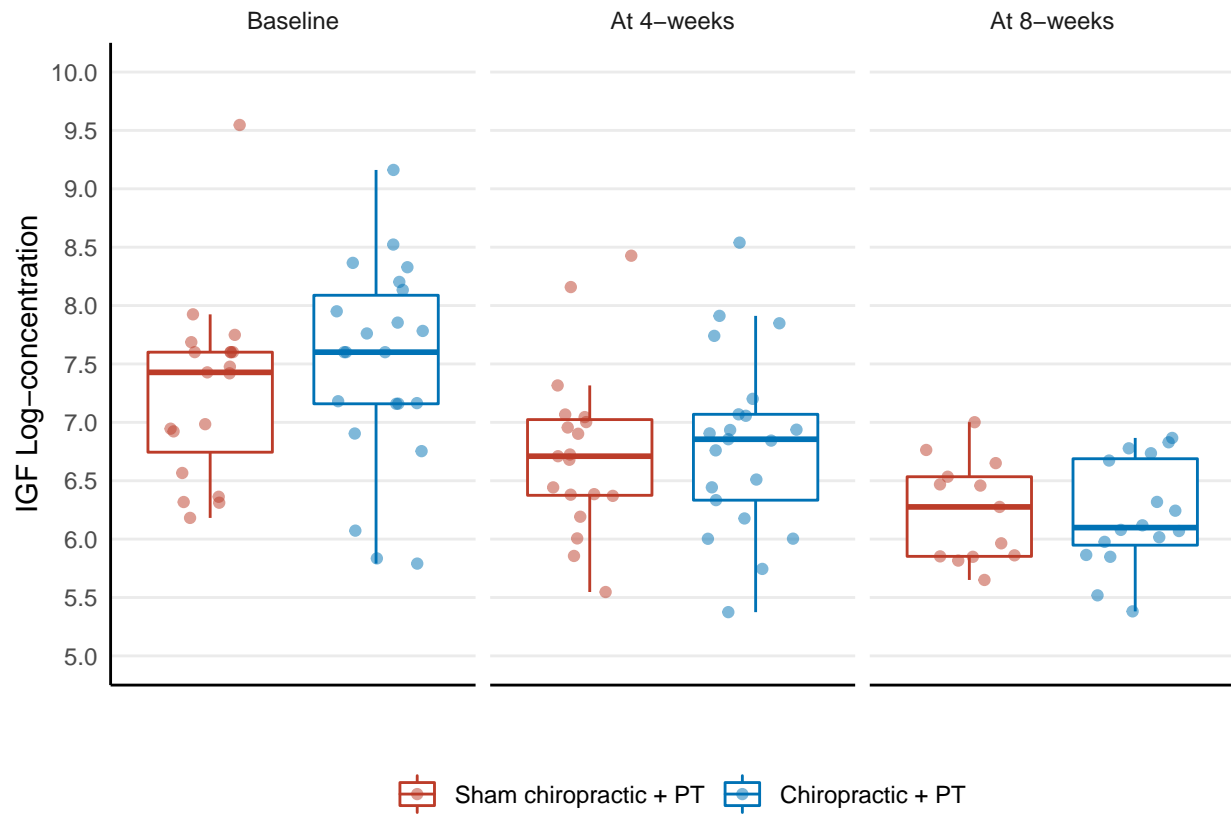

## 2 Statistical Model

### 2.1 Multivariate Analysis of Variance

```
lmerModel.multi <- lme(log(Concentration) ~ 0+Outcome*Time*Group,  
  random = ~ 0+Outcome|PartId,  
  Datasource.all,  
  na.action = na.omit,  
  weights = varIdent(form = ~ 1|Outcome),  
  control = lmeControl(maxIter = 1e3,  
    msMaxIter = 1e3,  
    niterEM = 1e3,  
    msMaxEval = 1e3))
```

### 2.2 Diagnostics for the Model

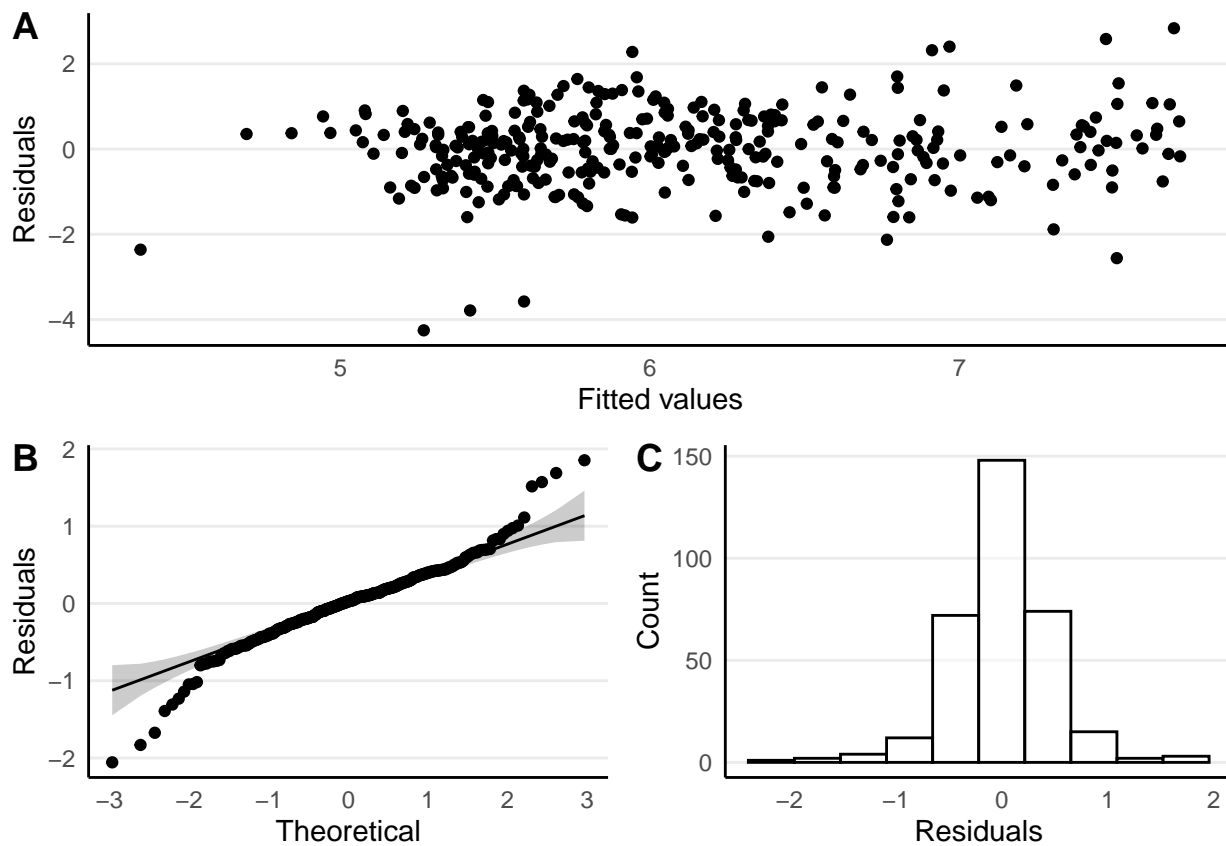

### 3 Results

#### 3.1 MANOVA Table

|                    | numDF | denDF | F-value      | p-value   |
|--------------------|-------|-------|--------------|-----------|
| Outcome            | 3     | 276   | 1836.1791798 | 0.0000000 |
| Time               | 2     | 276   | 3.6547016    | 0.0271292 |
| Group              | 1     | 40    | 0.7579630    | 0.3891619 |
| Outcome:Time       | 4     | 276   | 16.5596953   | 0.0000000 |
| Outcome:Group      | 2     | 276   | 1.5225641    | 0.2199784 |
| Time:Group         | 2     | 276   | 1.1820079    | 0.3082098 |
| Outcome:Time:Group | 4     | 276   | 0.4873873    | 0.7450067 |

#### 3.2 Estimated Means and their Contrasts

Mean difference (MD) is defined as [Chiropractic + PT – (Chiropractic + PT)Baseline] – [PT – (PT)Baseline].

| Outcome | Group                  | Time       | Mean | SE  | 95% CI lower | 95% CI upper |
|---------|------------------------|------------|------|-----|--------------|--------------|
| BDNF    | Sham chiropractic + PT | Baseline   | 5.8  | 0.1 | 5.5          | 6.0          |
| BDNF    | Chiropractic + PT      | Baseline   | 5.9  | 0.1 | 5.7          | 6.2          |
| BDNF    | Sham chiropractic + PT | At 4-weeks | 5.6  | 0.1 | 5.3          | 5.8          |
| BDNF    | Chiropractic + PT      | At 4-weeks | 5.8  | 0.1 | 5.6          | 6.1          |
| BDNF    | Sham chiropractic + PT | At 8-weeks | 5.3  | 0.2 | 5.0          | 5.6          |
| BDNF    | Chiropractic + PT      | At 8-weeks | 5.2  | 0.1 | 5.0          | 5.5          |
| GDNF    | Sham chiropractic + PT | Baseline   | 5.7  | 0.1 | 5.5          | 5.9          |
| GDNF    | Chiropractic + PT      | Baseline   | 5.6  | 0.1 | 5.4          | 5.7          |
| GDNF    | Sham chiropractic + PT | At 4-weeks | 5.6  | 0.1 | 5.4          | 5.8          |
| GDNF    | Chiropractic + PT      | At 4-weeks | 5.4  | 0.1 | 5.2          | 5.6          |
| GDNF    | Sham chiropractic + PT | At 8-weeks | 6.5  | 0.1 | 6.2          | 6.7          |
| GDNF    | Chiropractic + PT      | At 8-weeks | 6.3  | 0.1 | 6.1          | 6.5          |
| IGF     | Sham chiropractic + PT | Baseline   | 7.3  | 0.2 | 7.0          | 7.6          |
| IGF     | Chiropractic + PT      | Baseline   | 7.5  | 0.2 | 7.2          | 7.8          |
| IGF     | Sham chiropractic + PT | At 4-weeks | 6.7  | 0.2 | 6.4          | 7.1          |
| IGF     | Chiropractic + PT      | At 4-weeks | 6.8  | 0.2 | 6.5          | 7.1          |
| IGF     | Sham chiropractic + PT | At 8-weeks | 6.2  | 0.2 | 5.8          | 6.6          |
| IGF     | Chiropractic + PT      | At 8-weeks | 6.2  | 0.2 | 5.9          | 6.6          |

| Outcome | Contrast      | Mean  | SE   | 95% CI lower | 95% CI upper | DF  | t-Value | P-value |
|---------|---------------|-------|------|--------------|--------------|-----|---------|---------|
| BDNF    | MD At 4-weeks | 0.12  | 0.21 | -0.31        | 0.54         | 276 | 0.54    | 0.59    |
| BDNF    | MD At 8-weeks | -0.24 | 0.23 | -0.70        | 0.22         | 276 | -1.03   | 0.30    |
| GDNF    | MD At 4-weeks | -0.03 | 0.16 | -0.35        | 0.29         | 276 | -0.18   | 0.86    |
| GDNF    | MD At 8-weeks | -0.03 | 0.18 | -0.38        | 0.33         | 276 | -0.14   | 0.89    |
| IGF     | MD At 4-weeks | -0.18 | 0.29 | -0.75        | 0.40         | 276 | -0.61   | 0.54    |
| IGF     | MD At 8-weeks | -0.16 | 0.32 | -0.79        | 0.47         | 276 | -0.50   | 0.62    |

### 3.3 Estimated Means Plot

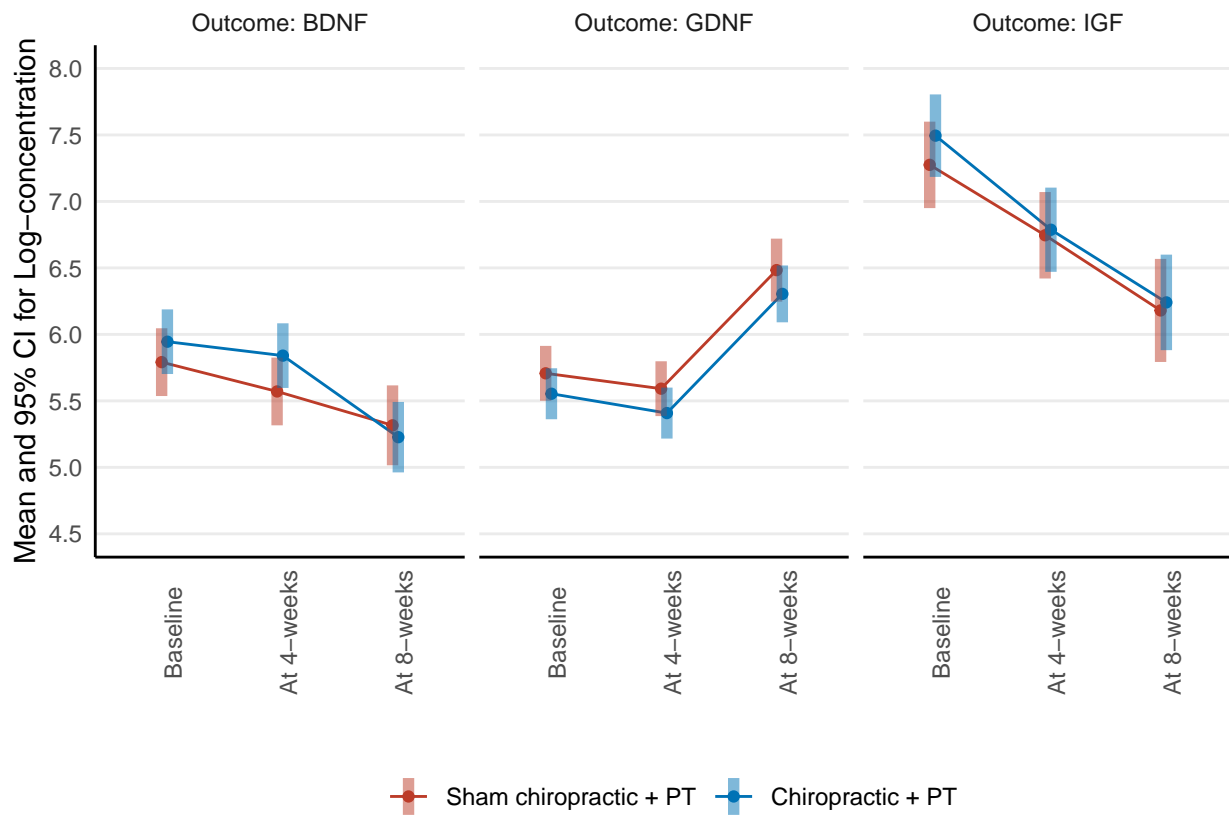

Supplement: s1 [file s1]
